# Supplementary material
Source: Springer Nature journal article supplement (http://springermedizin.de/resource/supplementary/12968_2011_2019_MOESM5_ESM.pdf/9581130)

A

B

C

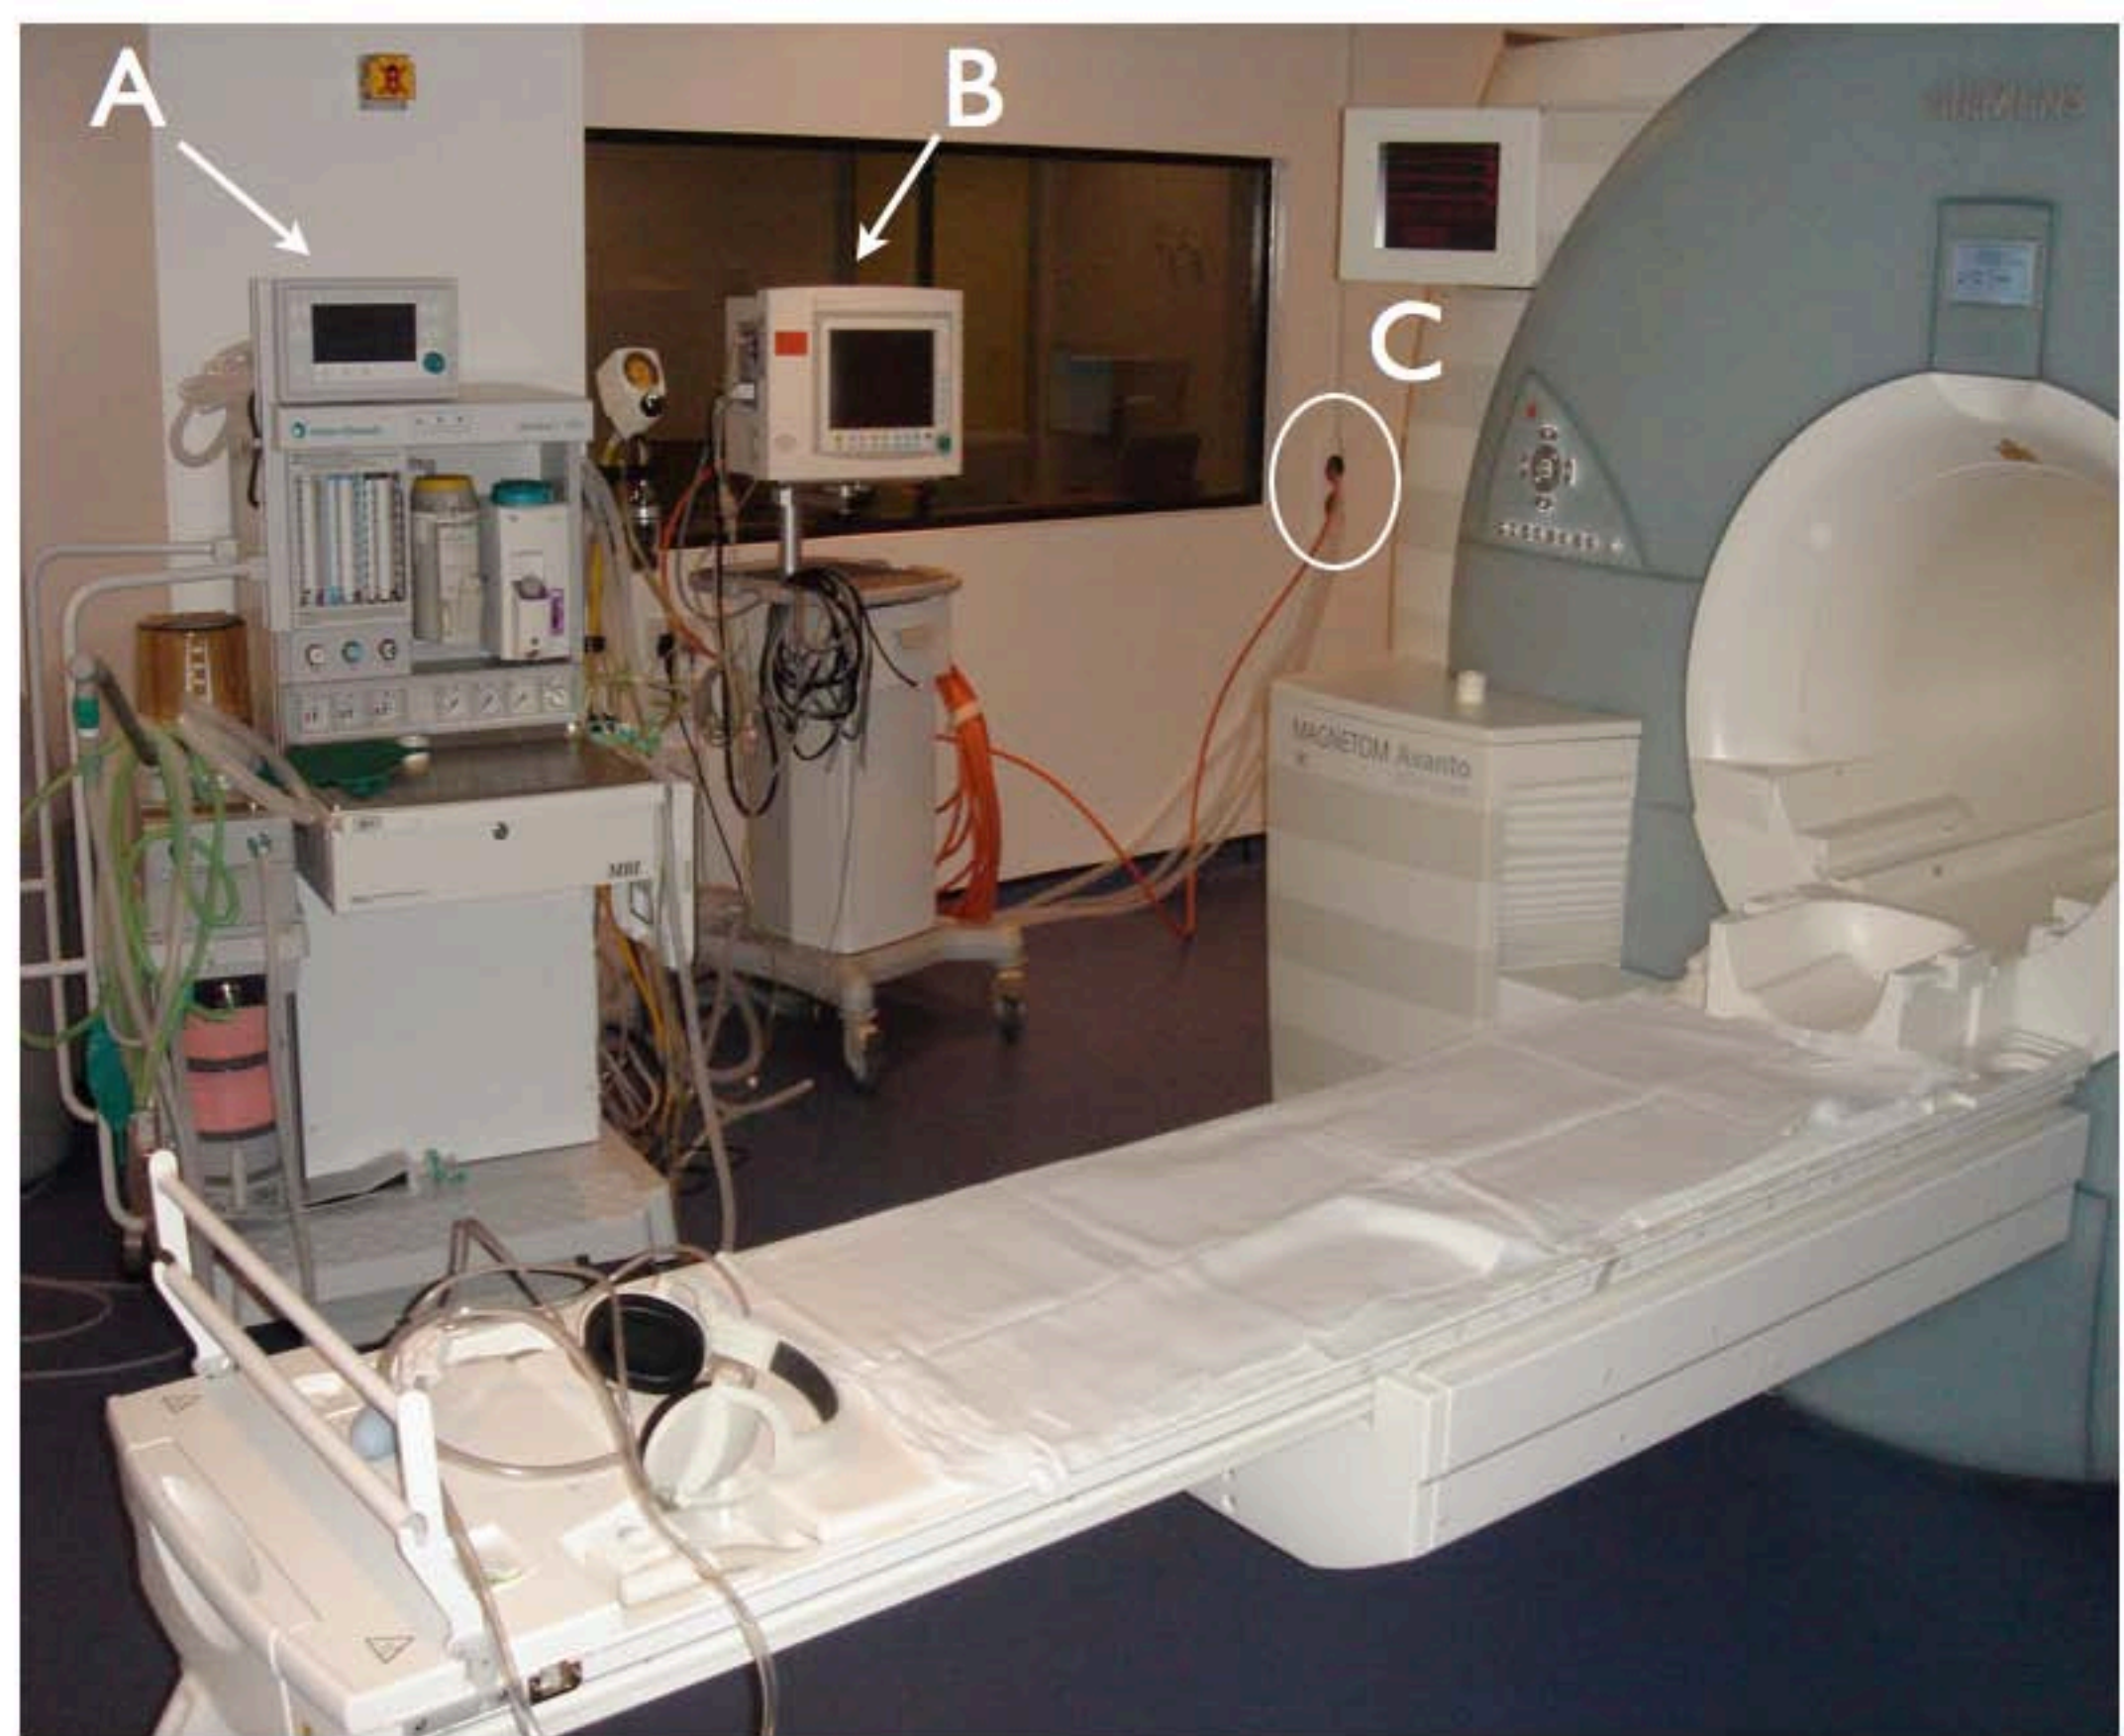

Supplement: MOESM5 [file 9581130]
